# Supplementary material
Source: Springer Nature journal article supplement (https://www.springermedizin.de/resource/supplementary/13054_2010_8663_MOESM1_ESM.pdf/9732520)

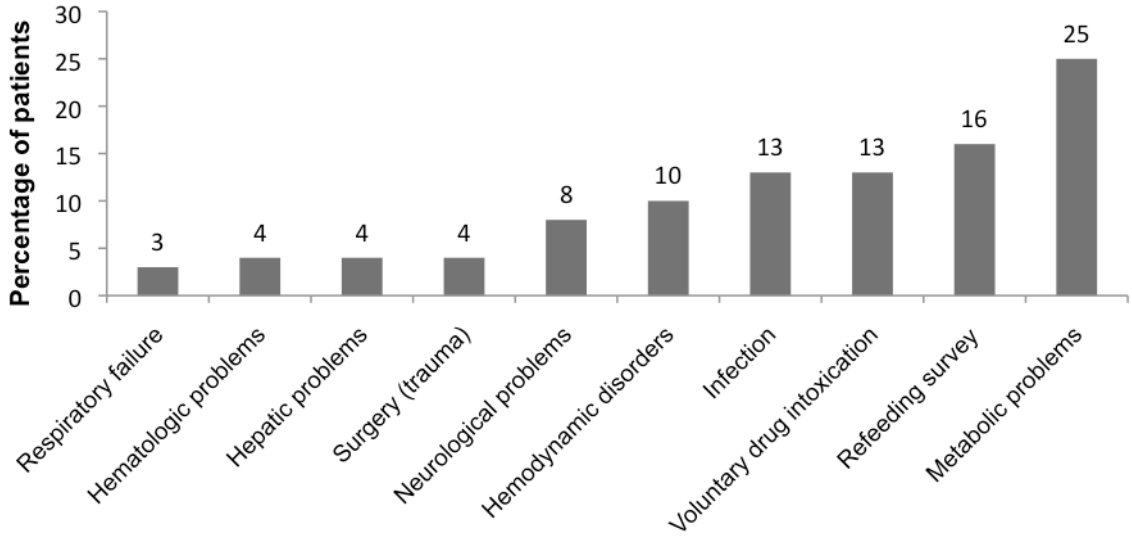

Supplement: MOESM1 [file 9732520]
